# Supplementary material
Source: PubMed Central journal article supplement (PMC4234576)
Supplement: pnas.201414063SI.pdf [file pnas.201414063SI.pdf]

# Supporting Information

Özen et al. 10.1073/pnas.1414063111

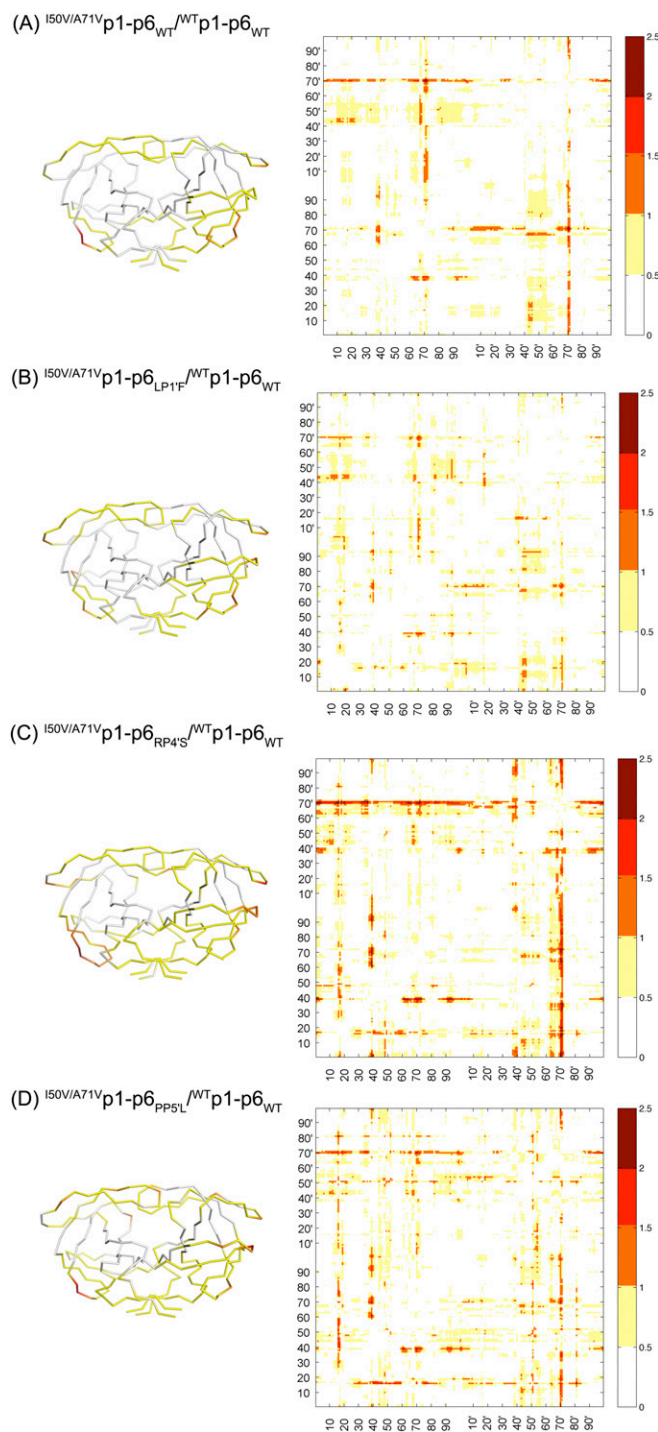

Fig. S1. Distance-difference maps showing the effect of protease-substrate coevolution on internal  $C\alpha-C\alpha$  distances in I50V/A71V protease with (A) WT and (B-D) mutant substrate with respect to the WT complex.







**Table S1. Crystallographic statistics for HIV-1 protease with p1-p6 substrate cocrystal structures**

|                           | WT <sub>WT</sub> | WT <sub>LP1'F</sub> | WT <sub>RP4'S</sub> | WT <sub>PP5'L</sub> | I50V <sub>WT</sub> | I50V <sub>LP1'F</sub> | I50V <sub>RP4'S</sub> | I50V <sub>PP5'L</sub> |
|---------------------------|------------------|---------------------|---------------------|---------------------|--------------------|-----------------------|-----------------------|-----------------------|
| PDB code                  | 1KJF (ref. 1)    | 4OBH (ref. 2)       | 4QJ9                | 4QJA                | 4QJ2               | 4QJ6                  | 4QJ7                  | 4QJ8                  |
| Resolution (Å)            | 2.00             | 1.85                | 1.84                | 1.54                | 2.14               | 1.50                  | 1.67                  | 2.00                  |
| Space group               | P212121          | P21                 | P212121             | P212121             | P21                | P21                   | P21                   | P21                   |
| a (Å)                     | 51.3             | 51.1                | 50.9                | 51.0                | 52.2               | 51.4                  | 51.6                  | 51.3                  |
| b (Å)                     | 59.1             | 62.8                | 57.9                | 58.2                | 63.3               | 59.8                  | 58.2                  | 62.7                  |
| c (Å)                     | 61.8             | 61.5                | 61.8                | 61.8                | 58.8               | 60.6                  | 61.8                  | 57.5                  |
| R <sub>merge</sub> (%)    | 6.7              | 7.3                 | 10.4                | 4.6                 | 3.3                | 5.6                   | 4.7                   | 7.6                   |
| Completeness (%)          | 93.4             | 99.7                | 98.4                | 97.1                | 94.5               | 97.5                  | 94.6                  | 94                    |
| Total no. of reflections  | 41,786           | 113,050             | 127,633             | 195,712             | 69,773             | 220,012               | 119,749               | 64,360                |
| No. of unique reflections | 12,376           | 28,931              | 16,417              | 27,160              | 20,171             | 56,731                | 40,242                | 23,065                |
| No. of molecules          | 1                | 2                   | 1                   | 1                   | 2                  | 2                     | 2                     | 2                     |
| R <sub>free</sub> (%)     | 25.1             | 21.28               | 20.81               | 17.78               | 23.84              | 21.41                 | 22.97                 | 23.53                 |
| R <sub>factor</sub> (%)   | 20.3             | 16.3                | 16.01               | 15.17               | 18.35              | 17.40                 | 17.87                 | 17.03                 |
| RMS in bond length (Å)    | 0.006            | 0.009               | 0.0093              | 0.0088              | 0.0097             | 0.0090                | 0.0089                | 0.0094                |
| RMS angle (degrees)       | 1.3              | 1.423               | 1.492               | 1.362               | 1.462              | 1.341                 | 1.402                 | 1.463                 |
| No. of waters             | 101              | 215                 | 161                 | 198                 | 279                | 421                   | 404                   | 214                   |

- Prabu-Jeyabalan M, Nalivaika E, Schiffer CA (2002) Substrate shape determines specificity of recognition for HIV-1 protease: Analysis of crystal structures of six substrate complexes. *Structure* 10(3):369–381.
- Kolli M, Ozen A, Kurt-Yilmaz N, Schiffer CA (2014) HIV-1 protease-substrate coevolution in nelfinavir resistance. *J Virol* 88(13):7145–7154.

**Table S2. Hydrogen bonds between the p1-p6 substrate and HIV-1 protease in cocrystal structures**

| Protease    | Substrate         | WT <sub>WT</sub> | I50V <sub>WT</sub> | I50V <sub>LP1'F</sub> | WT <sub>LP1'F</sub> | I50V <sub>RP4'S</sub> | WT <sub>RP4'S</sub> | I50V <sub>PP5'L</sub> | WT <sub>PP5'L</sub> |
|-------------|-------------------|------------------|--------------------|-----------------------|---------------------|-----------------------|---------------------|-----------------------|---------------------|
| Arg8' NH2   | P4 Pro O          | 4.0              | 3.01               | 2.72                  | 2.73                | 2.94                  | 2.97                | 2.89                  | 2.94                |
| Gly48 O     | P3 Gly N          | 3.01             | 2.97               | 3.03                  | 2.77                | 2.90                  | 3.03                | 2.88                  | 3.03                |
| Asp29 N     | P3 Gly O          | 2.79             | 2.87               | 2.82                  | 2.86                | 2.86                  | 2.92                | 2.82                  | 2.80                |
| Gly48 O     | P2 Asn N          | 3.05             | 2.86               | 2.88                  | 2.74                | 2.85                  | 2.88                | 2.96                  | 2.95                |
| Gly27 O     | P1 Leu/Phe N      | 2.93             | 2.90               | 2.81                  | 2.88                | 2.90                  | 2.80                | 2.78                  | 2.88                |
| Asn-25' ND2 | P1 Leu/Phe O      | 2.7              | 4.0/2.7            | 2.72                  | 2.74                | 3.9/2.9               | 3.7/2.7             | 2.70                  | 2.76                |
| Gly27 O     | P2' Gln N         | 2.95             | 2.94               | 2.97                  | 3.07                | 2.91                  | 2.83                | 2.95                  | 2.98                |
| Asp-30' N   | P2' Gln OE1       | 2.74             | 2.72               | 2.89                  | 2.86                | 2.81                  | 2.82                | 2.83                  | 2.77                |
| Asp-30' OD2 | P2' Gln NE2       | 2.95             | 2.73               | 2.79                  | 3.02                | 2.81                  | 4.6/2.8             | 2.98                  | 2.88                |
| Asp-29 N    | P2' Gln O         | 3.07             | 3.07               | 3.12                  | 3.15                | 3.04                  | 3.01                | 3.06                  | 3.10                |
| Gly-48' O   | P3' Ser N         | 3.00             | 2.58               | 2.83                  | 2.89                | 2.81                  | 2.89                | 2.84                  | 2.85                |
| Gly-48' N   | P3' Ser O         | 2.78             | 2.91               | 3.07                  | 3.26                | 2.87                  | 3.01                | 3.02                  | 3.02                |
| Asp-29' OD2 | P4' Arg/Ser N     | 3.8              | 2.95               | 2.85                  | 2.95                | 2.96                  | 3.06                | 2.84                  | 2.94                |
| Asp-30' OD2 | P4' Arg NE/Ser OG | 3.02             |                    |                       |                     | 2.59                  | 2.6/2.6             |                       |                     |

Bonds with acceptor–donor distances less and more than 3 Å are indicated by red and yellow, respectively. Distances greater than 3.8 Å are not considered bonded but are listed for comparison in green.
